# Supplementary material for: STAT5a/b Deficiency Delays, but does not Prevent, Prolactin-Driven Prostate Tumorigenesis in Mice
Source: PubMed Central journal article supplement (PMC6678910; doi:10.3390/cancers11070929), 2019-07-02

# Supplemental Materials: STAT5a/b Deficiency Delays, but does not Prevent, Prolactin-Driven Prostate Tumorigenesis in Mice

Florence Boutillon, Natascha Pigat, Lucila Sackmann Sala, Edouard Reyes-Gomez, Richard Moriggl, Jacques-Emmanuel Guidotti and Vincent Goffin

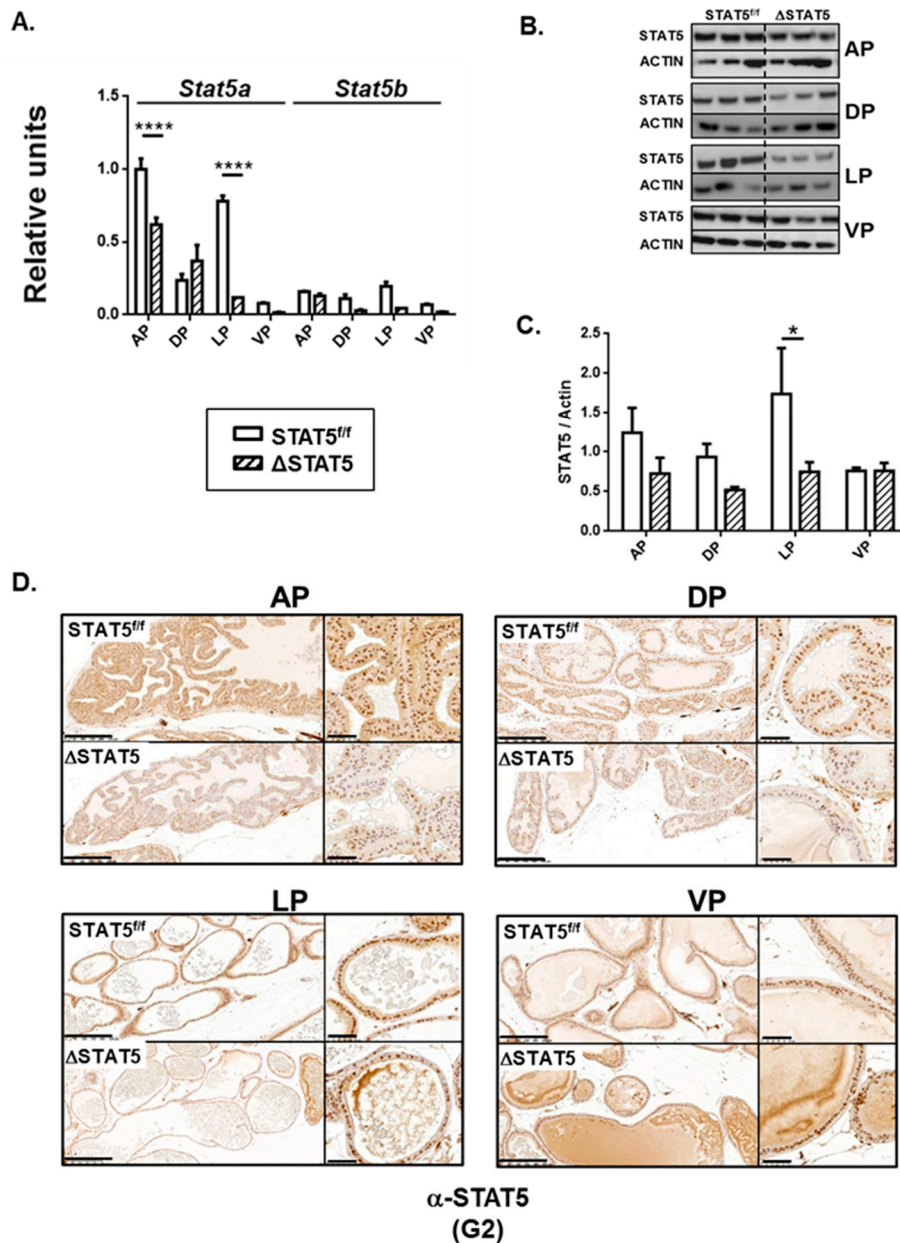

**Figure S1.** Lobe-specific pattern of STAT5 deletion in 6 month-old  $\Delta$ STAT5 mice. **A.** Lobe-specific expression of *STAT5A* and *STAT5B* mRNA in *STAT5<sup>fl/fl</sup>* and  $\Delta$ STAT5 mice as determined by RT-qPCR. **B–C.** Lobe-specific expression of STAT5 protein in *STAT5<sup>fl/fl</sup>* and  $\Delta$ STAT5 mice as determined by immunoblot (each lane corresponds to a different animal). Quantification of STAT5 expression (STAT5/ACTIN) was performed by densitometry (C). **D.** Immunohistochemical analysis of STAT5 expression in anterior (AP), dorsal (DP), lateral (LP) and ventral (VP) prostates of *STAT5<sup>fl/fl</sup>* and  $\Delta$ STAT5 mice, as indicated. *Statistics:* Stars denote significant differences in a repeated-measures two-way ANOVA with Sidak's multiple comparisons. Size bars: 250  $\mu$ m in large images and 50  $\mu$ m in insets. \*  $p < 0.05$ ; \*\*\*\*  $p < 0.0001$ .

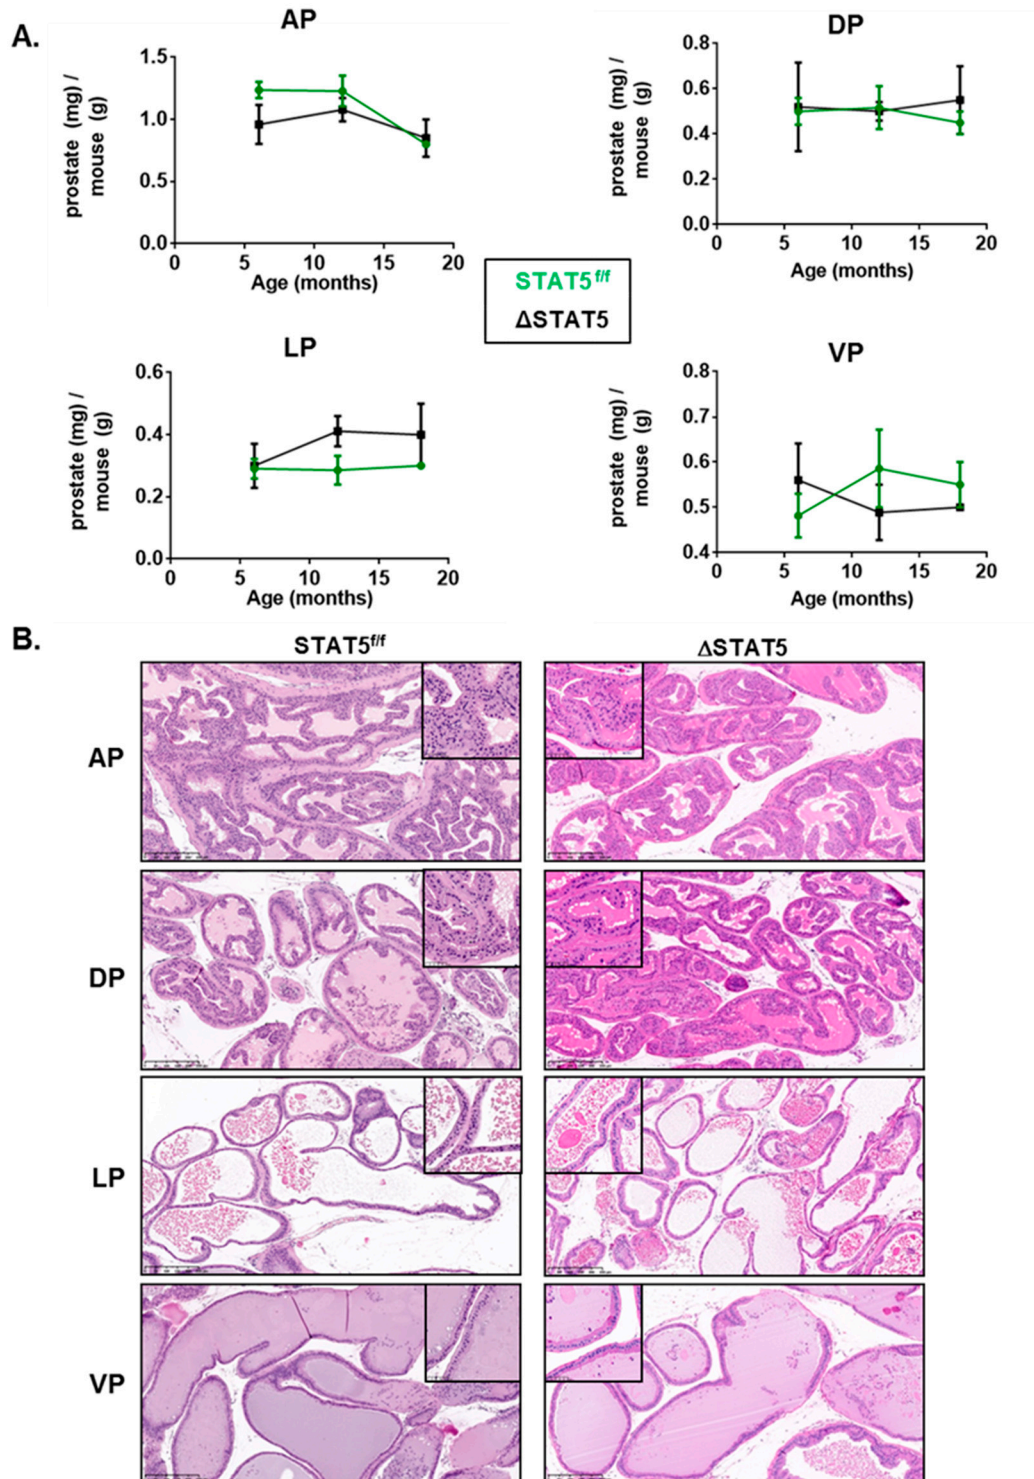

**Figure S2.** STAT5 deletion has no detectable effect on the prostate tissue. **A.** The prostate weight in 6, 12 and 18 month-old STAT5<sup>fl/fl</sup> and ΔSTAT5 mice is expressed as the ratio of total prostate normalized to the weight of corresponding animal. There was no genotype-dependent difference between age-matched mice. **B.** Histological analysis (hematoxylin counterstaining) of the four prostate lobes from 6 month-old STAT5<sup>fl/fl</sup> and ΔSTAT5 mice showing no obvious sign of abnormalities. Size bars: 250 μm in large images and 50 μm in insets.

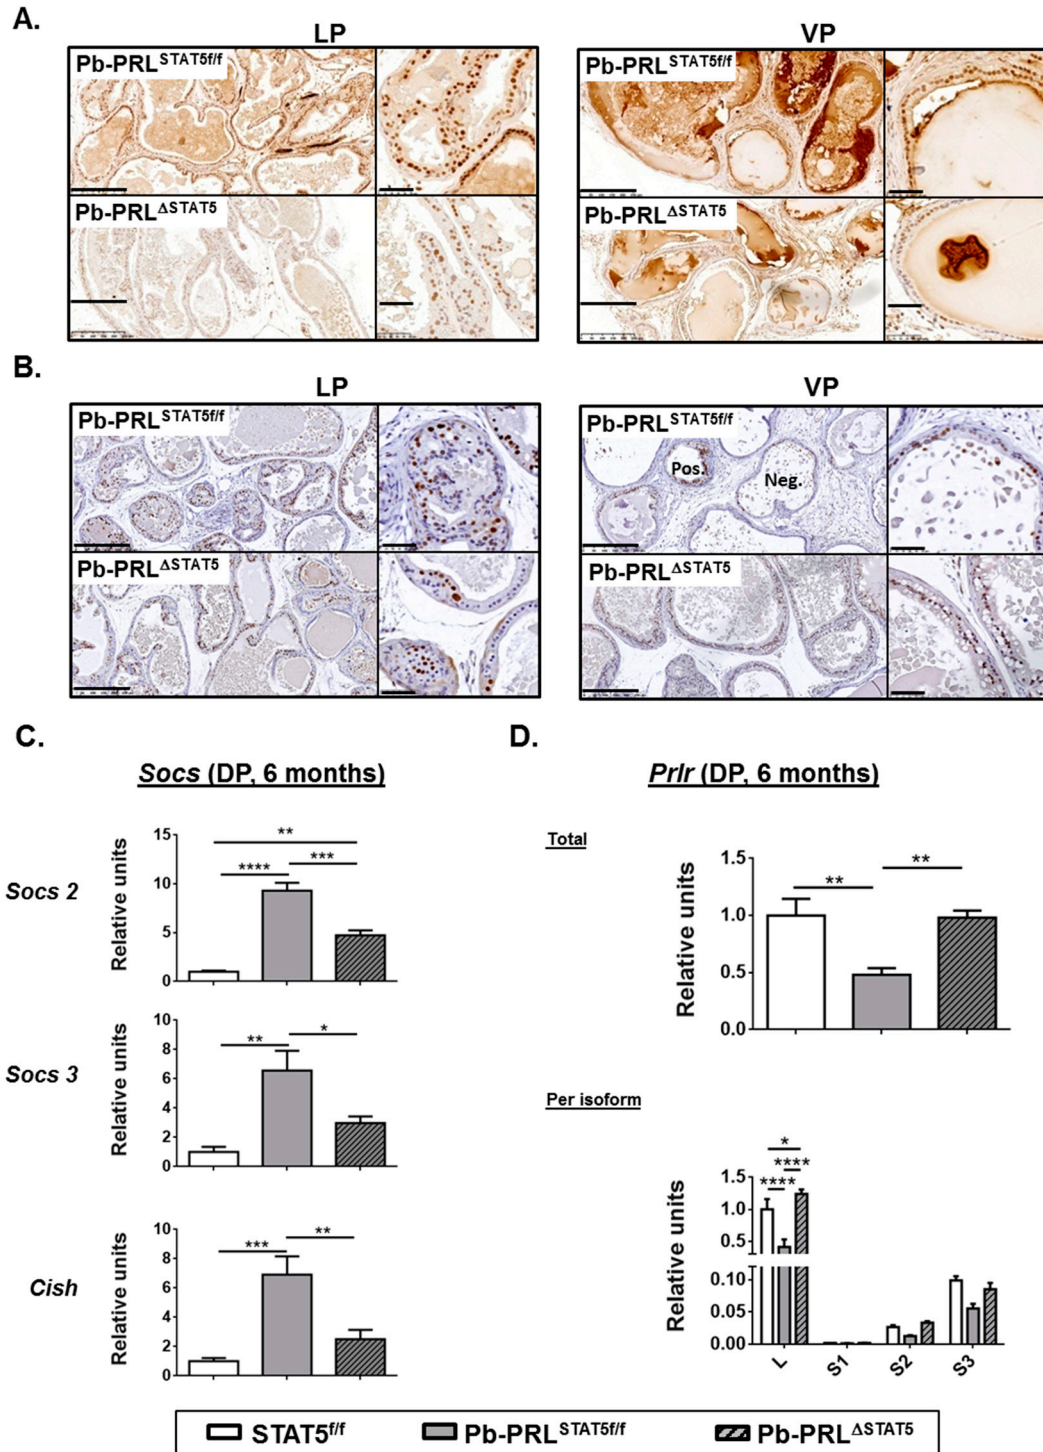

**Figure S3.** Lobe-specific pattern of STAT5 deletion of 6 month-old  $Pb-PRL^{\Delta STAT5}$  mice (complementary to Figure 1). **A–B.** Immunohistochemical analysis of STAT5 expression (A) and phosphorylation (B) in lateral (LP) and ventral (VP) prostates of  $Pb-PRL^{STAT5^{fl/fl}}$  and  $Pb-PRL^{\Delta STAT5}$  mice, as indicated (see main Figure 1 for details). **C–D.** The mRNA expression of SOCS genes (C) and *PRLR* (D) was monitored in dorsal prostates of 6 month-old  $STAT5^{fl/fl}$ ,  $Pb-PRL^{STAT5^{fl/fl}}$  and  $Pb-PRL^{\Delta STAT5}$  using RT-qPCR. Statistics: Stars denote significant differences in a repeated-measures one-way ANOVA with Tukey’s multiple comparisons (C) or two-way ANOVA with Sidak’s multiple comparisons (D). Size bars: 250  $\mu m$  in large images and 50  $\mu m$  in insets. Size bars: 250  $\mu m$  in large images and 50  $\mu m$  in insets. \*  $p < 0.05$ , \*\*  $p < 0.01$ , \*\*\*  $p < 0.001$ , \*\*\*\*  $p < 0.0001$ .

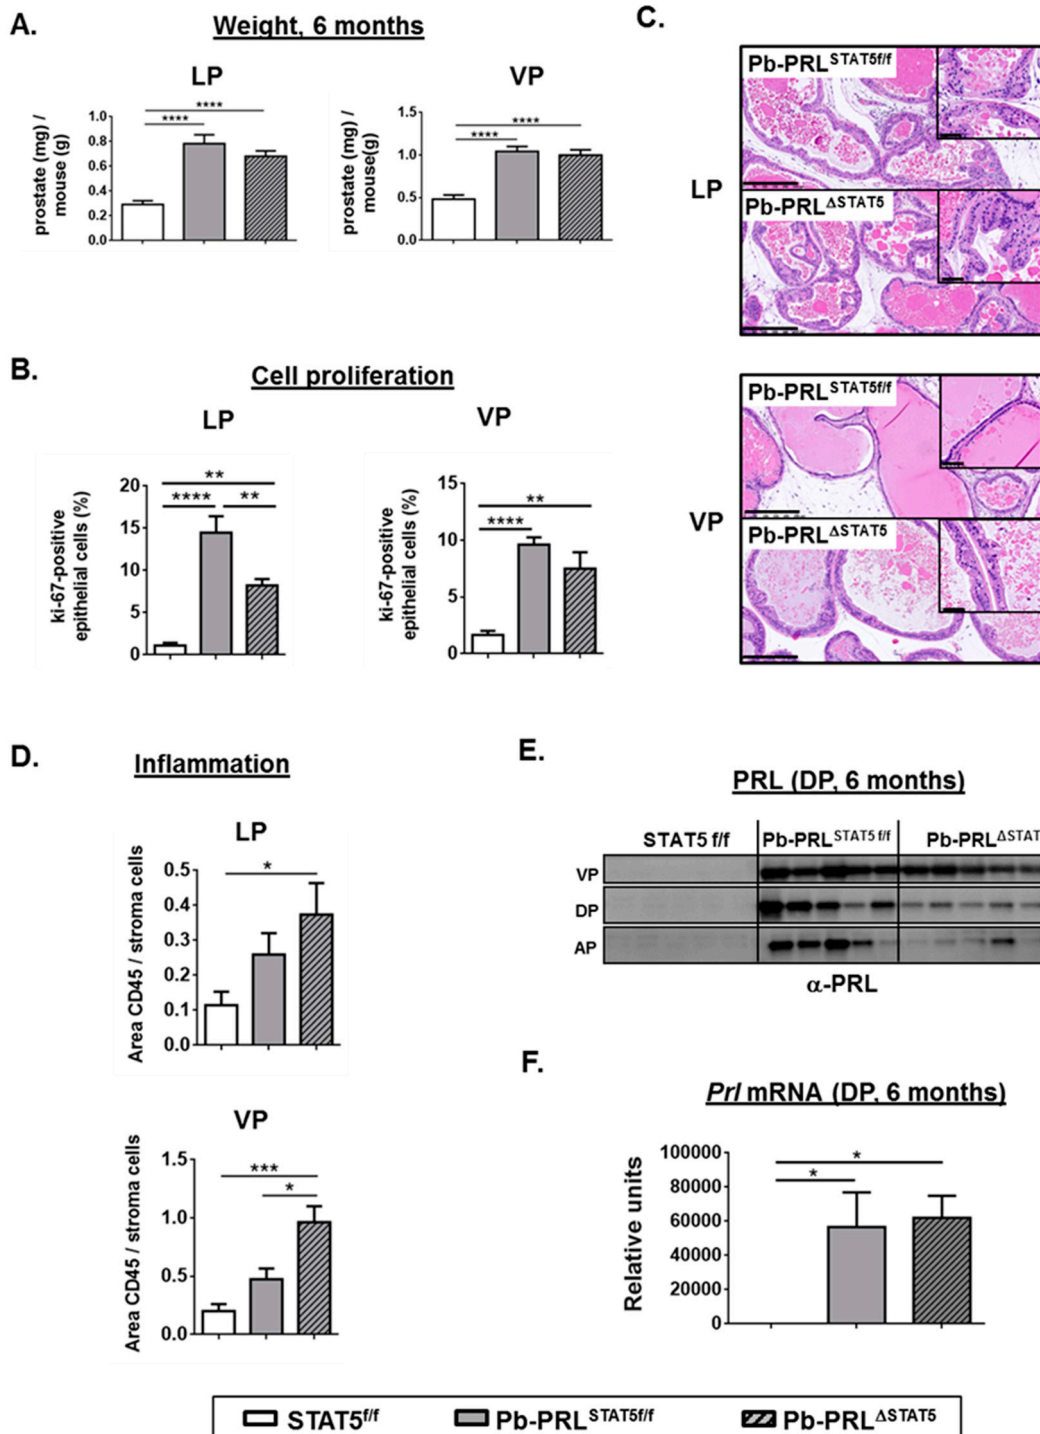

**Figure S4.** Lobe-specific effects of STAT5 deletion of 6 month-old Pb-PRL<sup>ΔSTAT5</sup> mice (complementary to Figure 4). **A.** The weight of lateral (LP) and ventral (VP) prostate lobes in 6 month-old STAT5<sup>fl/fl</sup>, Pb-PRL<sup>STAT5<sup>fl/fl</sup></sup> and Pb-PRL<sup>ΔSTAT5</sup> mice is expressed as the ratio of lobe weight normalized to the weight of corresponding animal. **B.** The proliferation index of lateral and ventral prostate was determined in the three genotypes (see Figure 4 for details). **C.** Histological analysis (hematoxylin counterstaining) of lateral and ventral lobes of Pb-PRL<sup>STAT5<sup>fl/fl</sup></sup> and Pb-PRL<sup>ΔSTAT5</sup> mice showing similar hyperplasia in both genotypes. **D.** Inflammation was identified using CD45 immunostaining. The degree of inflammation was quantified using Calopix software and is represented as the ratio of CD45+ area *versus* stroma area. **E,F.** Expression of rat *PRL* transgene was monitored using immunoblot (D) and RT-qPCR (E) in the three genotypes. Stars denote significant differences in a repeated-measures one-way ANOVA with Tukey’s multiple comparisons. \*  $p < 0.05$ , \*\*  $p < 0.01$ , \*\*\*  $p < 0.001$ , \*\*\*\*  $p < 0.0001$ .

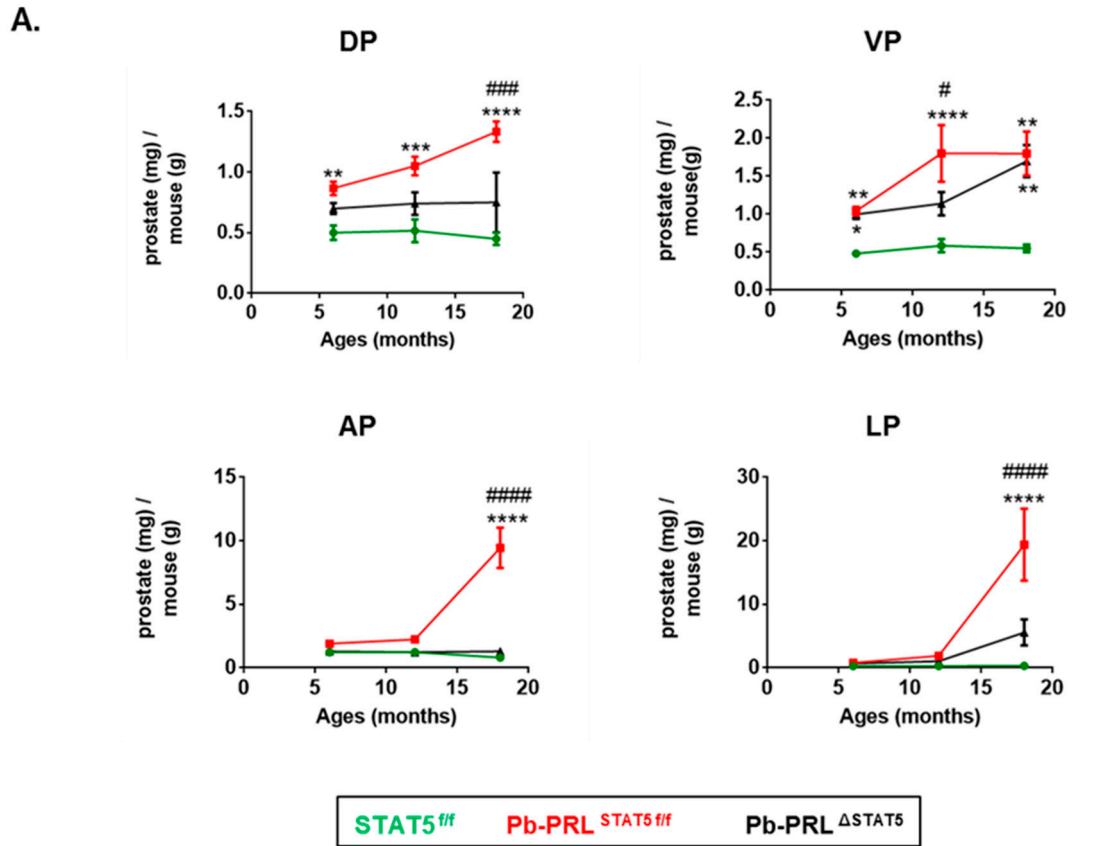

**B.**

**12 months**

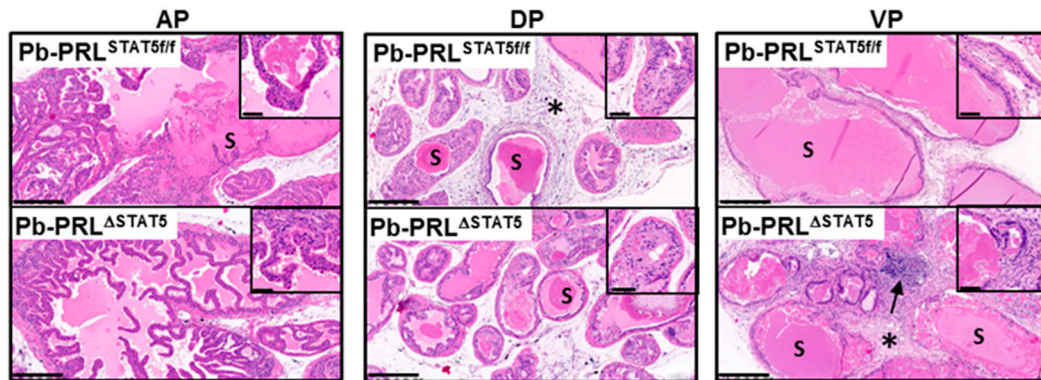

**Figure S5.** STAT5 deletion does not prevent prostate tumor progression in aged Pb-PRL mice (complementary to Figure 5). **A.** The prostate weight in 6, 12 and 18 month-old STAT5<sup>f/f</sup>, Pb-PRL<sup>STAT5<sup>f/f</sup></sup> and Pb-PRL<sup>ΔSTAT5</sup> mice is expressed as the ratio of total prostate weight normalized to the weight of corresponding animal. Symbols: \*  $p < 0.05$ , \*\*  $p < 0.01$ , \*\*\*  $p < 0.001$ , \*\*\*\*  $p < 0.0001$  (versus STAT5<sup>f/f</sup>); #  $p < 0.05$ , ##  $p < 0.01$ , ###  $p < 0.001$ , ####  $p < 0.0001$  (versus Pb-PRL<sup>ΔSTAT5</sup>). **B.** Histological analysis (hematoxylin counterstaining) of the anterior (AP), dorsal (DP) and ventral (VP) prostate lobes from 12 month-old Pb-PRL<sup>STAT5<sup>f/f</sup></sup> and Pb-PRL<sup>ΔSTAT5</sup> mice showing similar abnormalities including PINs, increased stromal density (stars), inflammation (arrows) and dense eosinophilic secretions (S). Statistics: Symbols (\*: vs age-matched STAT5<sup>f/f</sup>; #: versus age-matched Pb-PRL<sup>ΔSTAT5</sup>) denote significant differences in a repeated-measures two-way ANOVA with Tukey's multiple comparisons. Size bars: 250  $\mu\text{m}$  in large images and 50  $\mu\text{m}$  in insets.

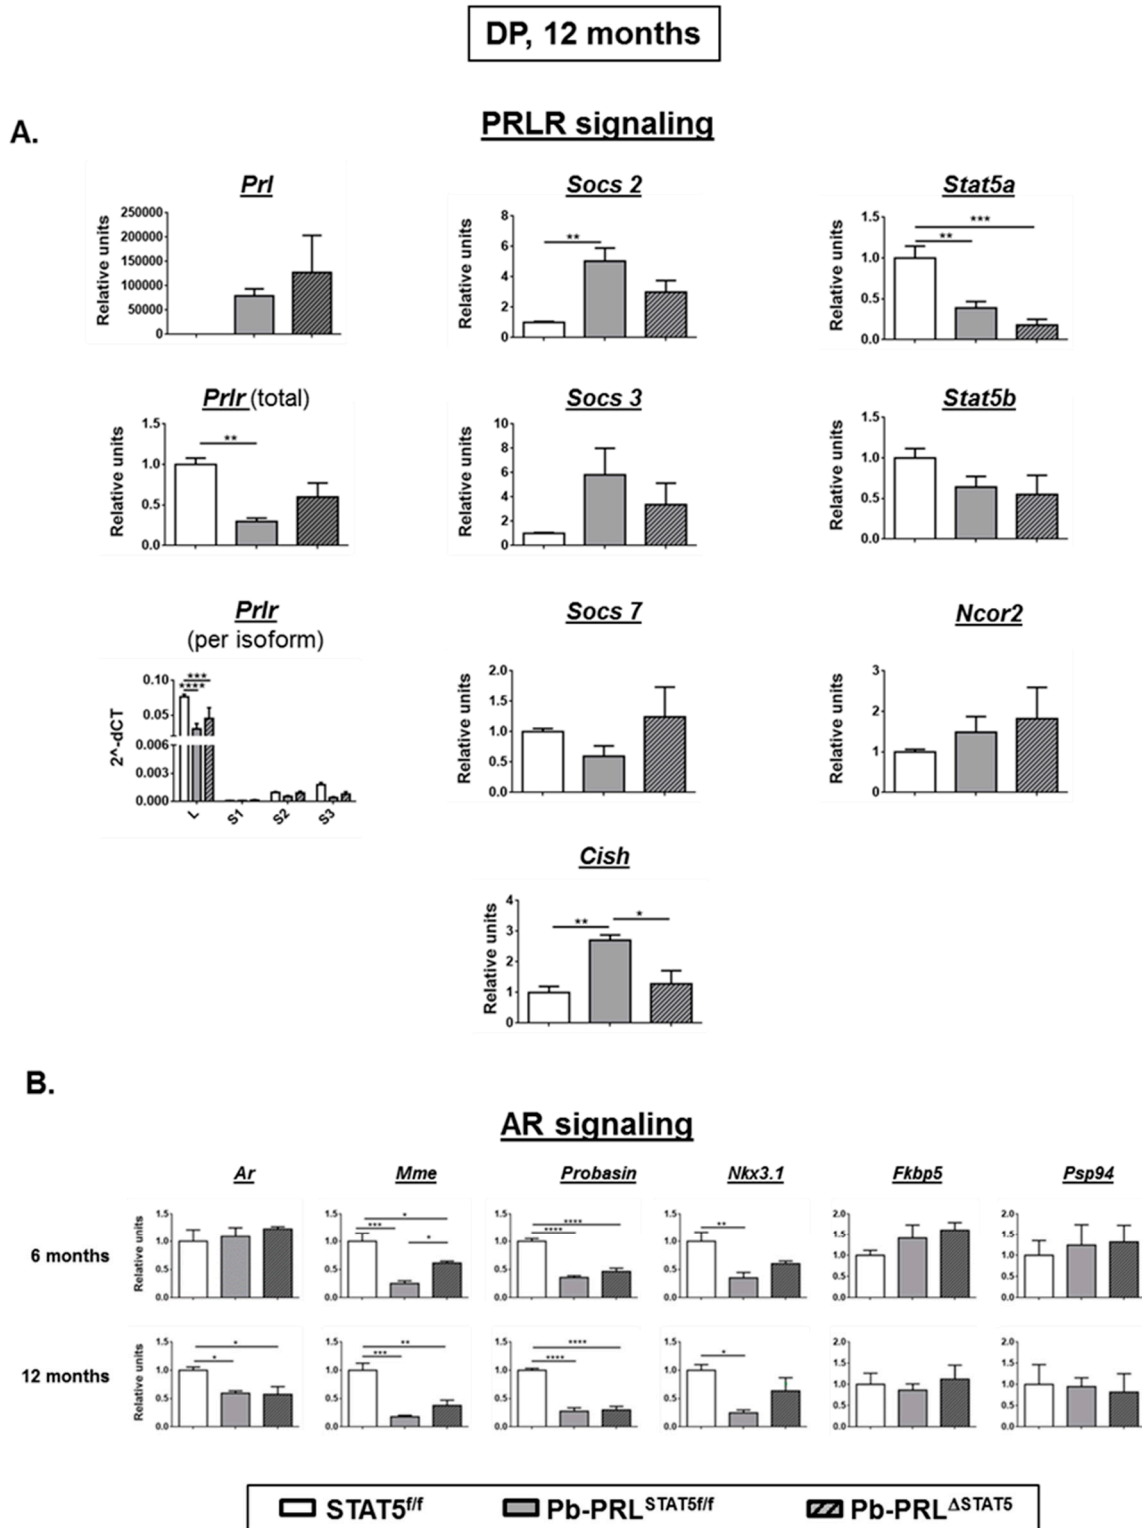

**Figure S6.** Characterization of PRLR and AR signaling pathways in dorsal prostate of 12 month-old STAT5<sup>fl/fl</sup>, Pb-PRL<sup>STAT5fl/fl</sup> and Pb-PRL<sup>ΔSTAT5</sup> mice (complementary to Figure 6). **A.** The expression of various actors of the PRLR pathway as determined by RT-qPCR was analyzed in dorsal prostates of 12 month-old STAT5<sup>fl/fl</sup>, Pb-PRL<sup>STAT5fl/fl</sup> and Pb-PRL<sup>ΔSTAT5</sup> mice. **B.** The expression of AR and of target genes of the AR pathway as determined by RT-qPCR was analyzed in dorsal prostates of 6 and 12 month-old STAT5<sup>fl/fl</sup>, Pb-PRL<sup>STAT5fl/fl</sup> and Pb-PRL<sup>ΔSTAT5</sup> mice, as indicated. In both panels data are expressed as fold-induction versus STAT5<sup>fl/fl</sup> samples. Statistics: Stars denote significant differences in a repeated-measures one-way ANOVA with Tukey's multiple comparisons. Except for PRLR (per isoform), stars denote significant differences in a repeated-measures two-way ANOVA with Tukey's multiple comparisons. \*  $p < 0.05$ , \*\*  $p < 0.01$ , \*\*\*  $p < 0.001$ , \*\*\*\*  $p < 0.0001$ .

**Breeding scheme**

*Italics : mouse genotypes*  
**Bold : name of mice used in this study**

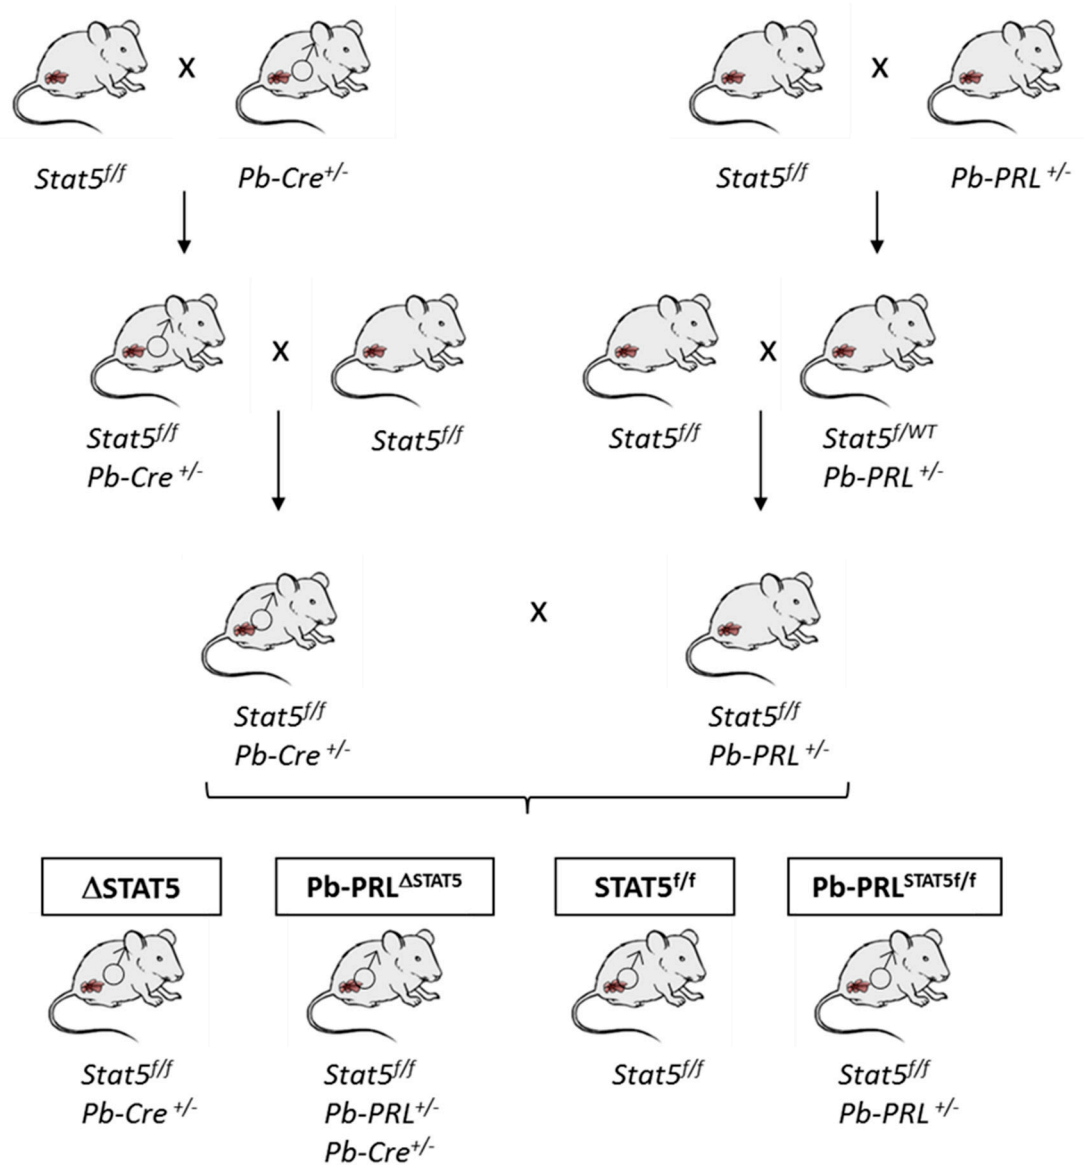

Figure S7. Breeding scheme.

Western-blot corresponding to Fig. 1B

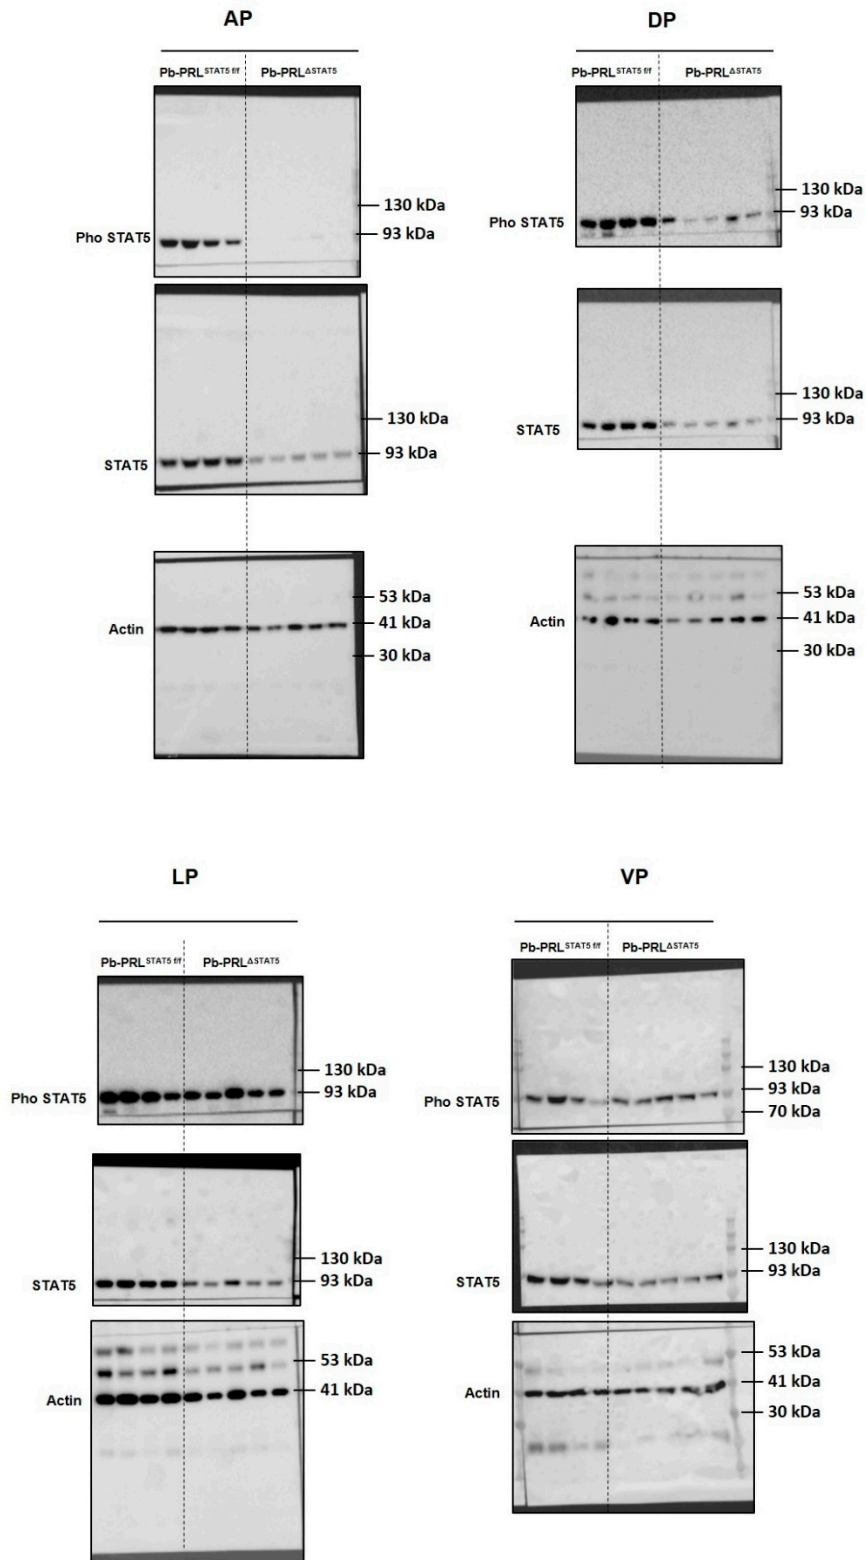

Figure S8. Cont.



### Western-blot corresponding to Fig. 4A

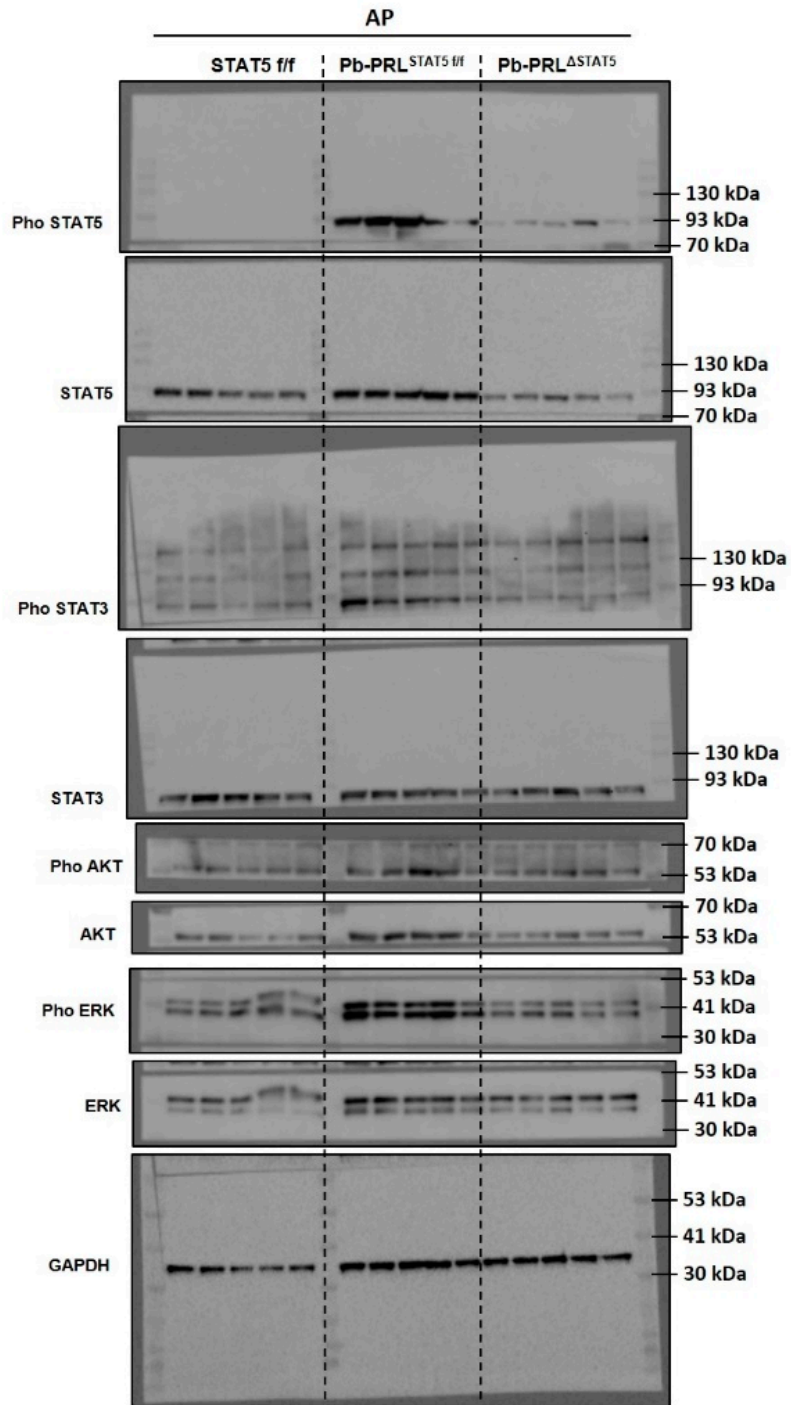

Figure S8. Cont.

### Western-blots corresponding to Fig. 4B

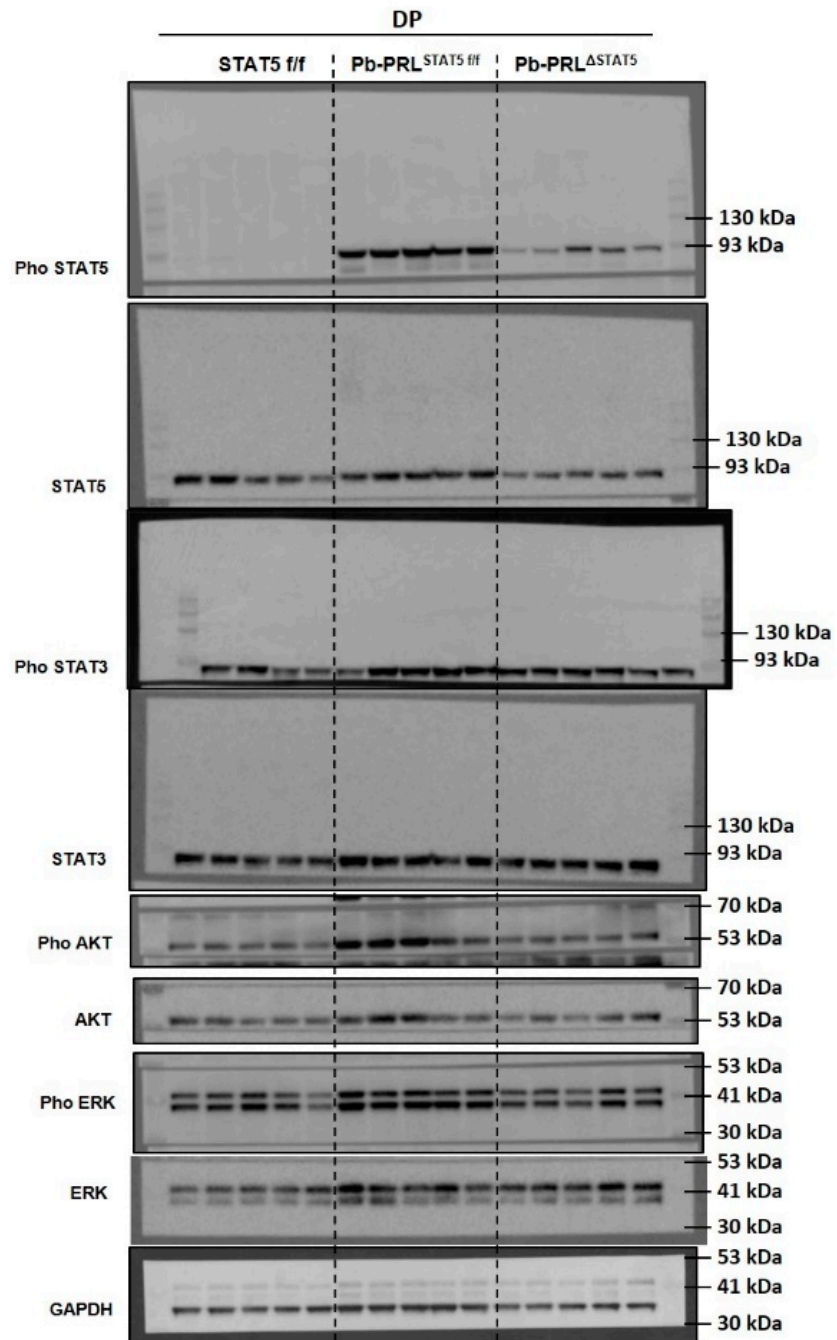

Figure S8. Cont.

### Western-blot corresponding to Fig. 4C

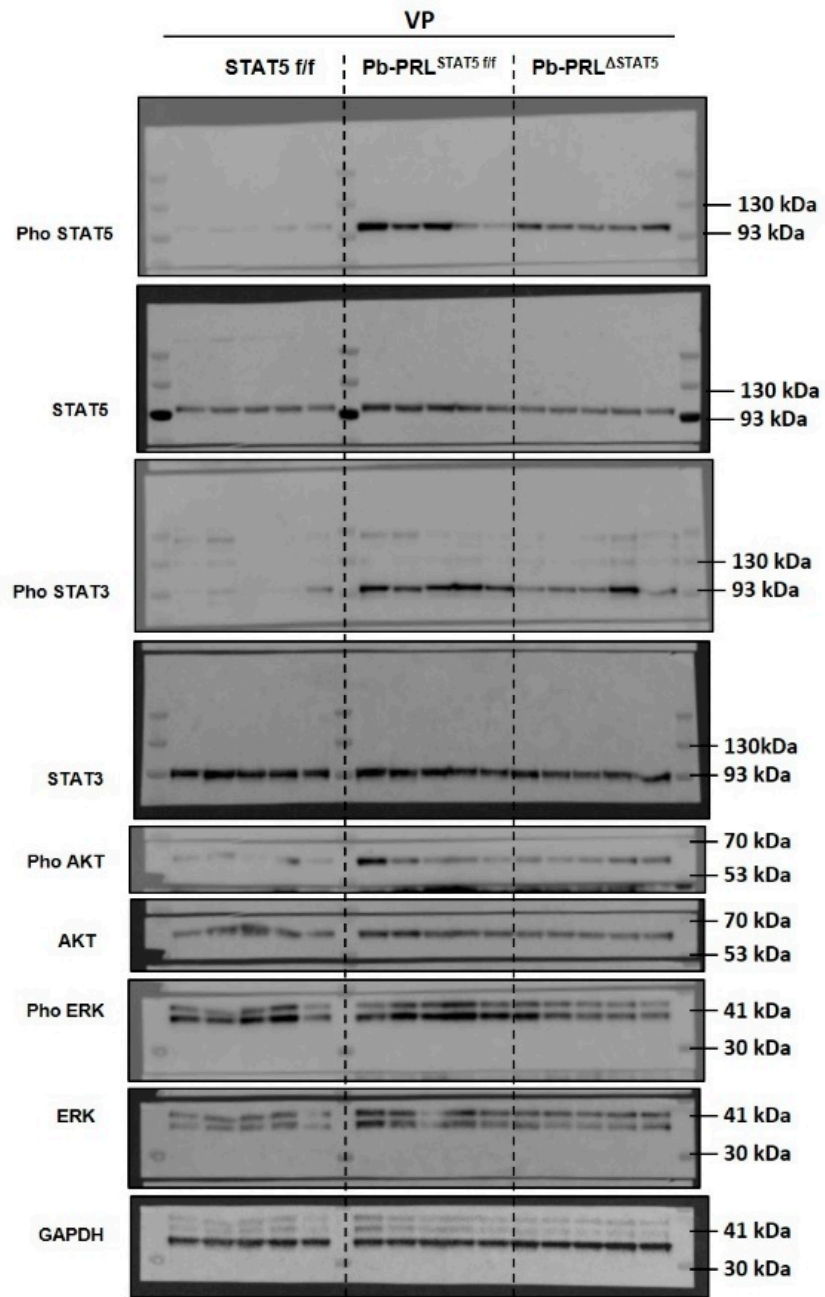

Figure S8. Cont.

### Western-blots corresponding to Fig. 6A

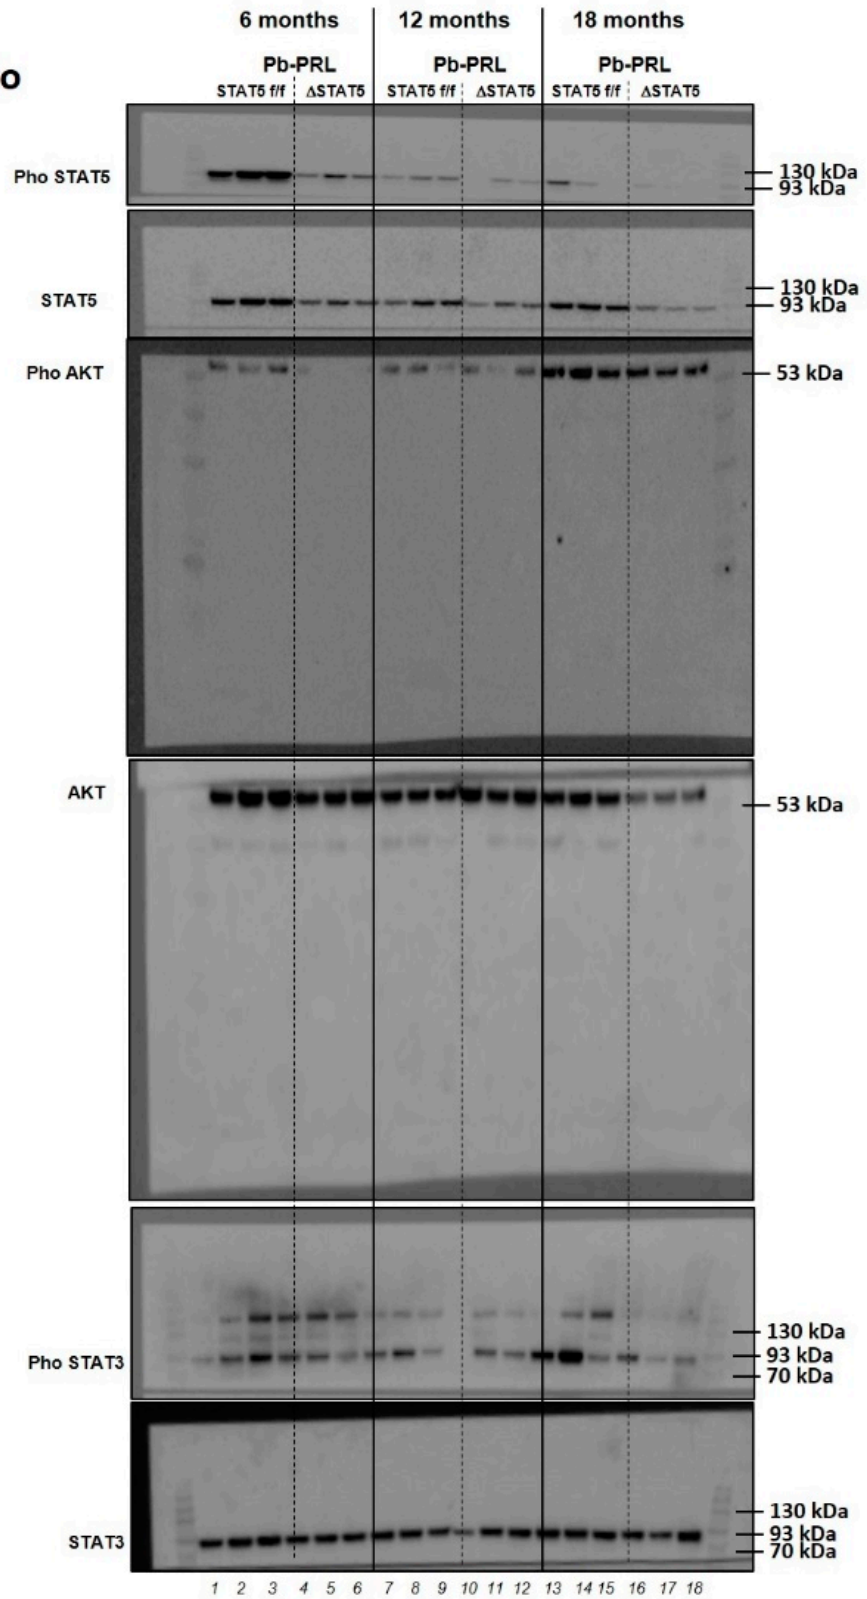

Figure S8. Cont.

**Western-blot  
corresponding to  
Fig. 6A (continued)**

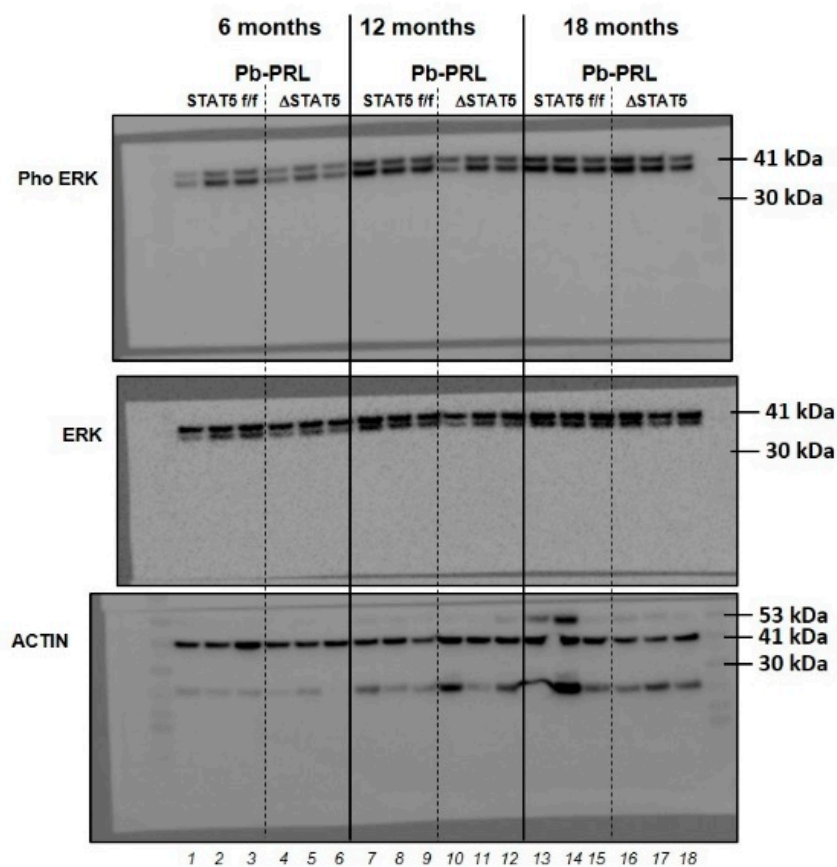

**Figure S8. Cont.**

Western-blots corresponding to Fig. S1B

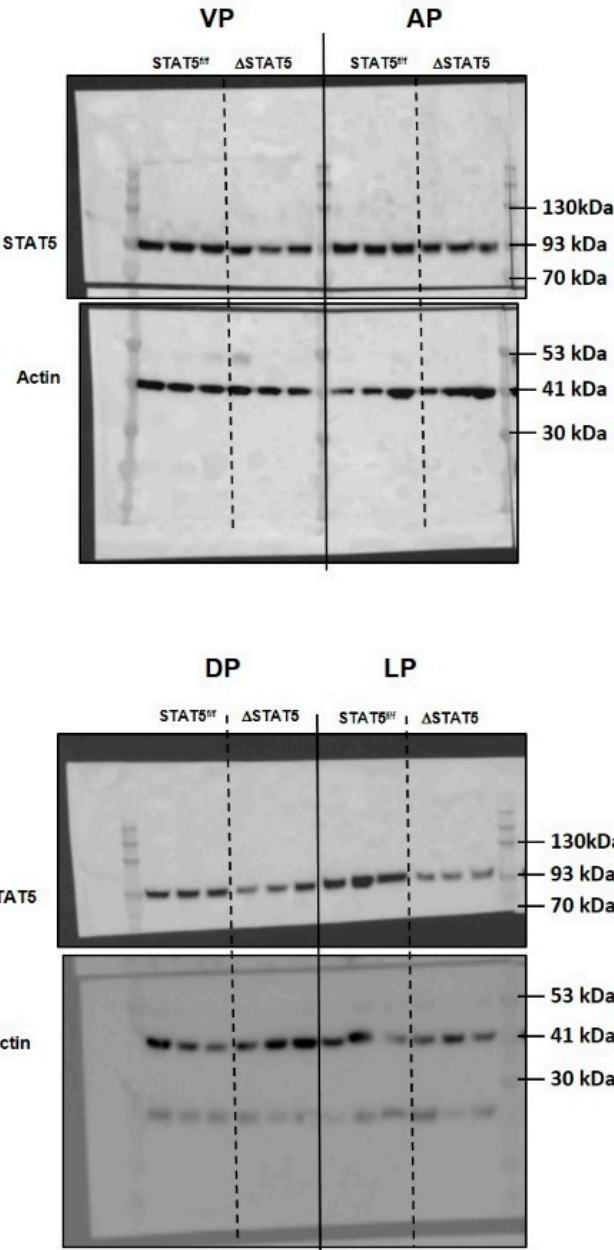

Figure S8. Cont.

## Western-blot corresponding to Fig. S4E

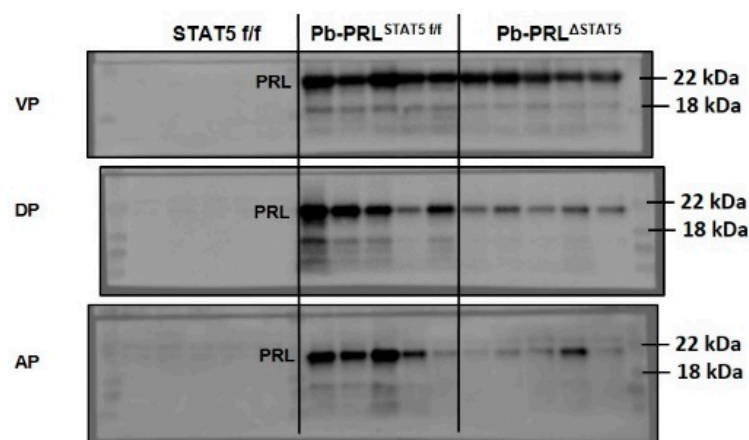

**Figure S8.** Whole Western blot membranes corresponding to representative images shown in main and supplemental Figures, as indicated (continued on the next pages)

**Table S1.** Antibody references and conditions of use.

| Target  | Ref./Clone                | Provider                                        | Dilution                   |
|---------|---------------------------|-------------------------------------------------|----------------------------|
| STAT5   | Sc 835/C-17               | Santa cruz                                      | Blot: 1/2,000              |
| STAT5b  | Sc 1656/G2 *              | Santa cruz                                      | IHC: 1/200                 |
| pSTAT5  | 9359/C11C5                | Cell Signaling                                  | Blot: 1/1000<br>IHC: 1/300 |
| STAT3   | 12640/D3Z2G               | Cell Signaling                                  | Blot: 1/1000               |
| pSTAT3  | 9131S                     | Cell Signaling                                  | Blot: 1/1000               |
| Erk1/2  | 9102                      | Cell Signaling                                  | Blot: 1/3000               |
| pErk1/2 | 4370/D13.14.4E            | Cell Signaling                                  | Blot: 1/1000               |
| Akt     | 9272                      | Cell Signaling                                  | Blot: 1/1000               |
| pAkt    | 9271S                     | Cell Signaling                                  | Blot: 1/1000               |
| CD45    | sc-53665/30-F11           | Santa Cruz                                      | IHC: 1/150                 |
| Ki-67   | RM9106/SP6                | Thermo Scientific                               | IHC: 1/300                 |
| GAPDH   | 2118S/14C10               | Cell Signaling                                  | Blot: 1/1000               |
| Actin   | A5316                     | Sigma                                           | Blot: 1/5000               |
| PRL     | Anti-mPRL-IC<br>AFP879151 | National hormone & peptide program (Dr. Parlow) | Blot: 1/1000               |

\* maps amino acids 750-779 that are common to both STAT5 isoforms.

Table S2. Primers used for qPCR.

| Gene                          | Name            | 5'-3' sequence                 |
|-------------------------------|-----------------|--------------------------------|
| <i>Cyclophilin</i>            | Cyclophilin A-R | TTGCTGGTCTTGCCATTCCT           |
|                               | Cyclophilin A-R | CAGGTCCTGGCATCTTGTC            |
| <i>Probasin</i>               | Mouse F         | GCATGTGCTAGGCGTCTCC            |
|                               | Mouse R         | GTTCTCAATGGTGAGCCTTCAT         |
| <i>Stat5a</i>                 | Mouse F         | CATTGCTTGGAAAGTTTGACTCTC       |
|                               | Mouse R         | CACGTAGATAAGGTAGTTCAGGTC       |
| <i>Stat5b</i>                 | Mouse F         | GCACCTTCAGATCAACCAAAC          |
|                               | Mouse R         | CAGCTGGGCAAACCTGAG             |
| <i>Socs 1</i>                 | Mouse F         | ATTCCACTCCTACCTCTCCAT          |
|                               | Mouse R         | CAGAAAAATGAAGCCAGAGACC         |
| <i>Socs 2</i>                 | Mouse F         | GCGCGAGCTCAGTCAAAC             |
|                               | Mouse R         | CTGGAGCCTCTTTTAATTTCTCTTT      |
| <i>Socs3</i>                  | Mouse F         | GAGATTTGCTTCGGGACTA            |
|                               | Mouse R         | GGAAACTTGCTGTGGGTGA            |
| <i>Cish</i>                   | Mouse F         | GCTCCTTTCTCCTTATCC             |
|                               | Mouse R         | CCGCCAATTTGCTCCA               |
| <i>Ncor2</i>                  | Mouse F         | TGGAACCCGGCACCGC               |
|                               | Mouse R         | GGTAGGGTAGACCCCTT              |
| <i>Prlr</i><br>(all isoforms) | Mouse F         | ATAAAAGGATTTGATACTCATCTGCTAGAG |
| <i>Prlr L</i>                 | Mouse R         | TGTCATCCACTTCCAAGAACTCC        |
| <i>Prlr S1</i>                | Mouse R         | CATAAAAACCTCAGTTGTTGGAATCTTCA  |
| <i>Prlr S2</i>                | Mouse R         | GGAAAAAGACATGGCAGAAACC         |
| <i>Prlr S3</i>                | Mouse R         | AGTCCCCTTCATTGTCCAGTTT         |
| <i>Ar</i>                     | Mouse F         | GAGAGAGGCAGCTTGTGCAT           |
|                               | Mouse R         | TACTGAATGACCGCCATCTG           |
| <i>Nkx3.1</i>                 | Mouse F         | ATGCTTAGGGTAGCGGAGC            |
|                               | Mouse R         | TGCGGATGCTGAGTGTGTC            |
| <i>Fkbp5</i>                  | Mouse F         | TTTGAAGATTCAGGCGTTATCCG        |
|                               | Mouse R         | GGTGGACTTTTACCGTTGCTC          |
| <i>Mme</i>                    | Mouse F         | GGTTGAAACGCAACGTCATTC          |
|                               | Mouse R         | CTGCACTGCTACTATGTCTTCAG        |
| <i>Psp94</i>                  | Mouse F         | TGGTGATAGCATCCAAAGCA           |
|                               | Mouse R         | GCTTGTACCATCAGCATCC            |
| <i>Probasin</i>               | Mouse F         | GCATGTGCTAGGCGTCTCC            |
|                               | Mouse R         | GTTCTCAATGGTGAGCCTTCAT         |

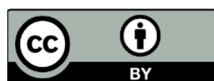

Supplement: cancers-11-00929-s001.pdf [file cancers-11-00929-s001.pdf]
